# Supplementary material
Source: Royal Society of Chemistry journal article supplement (doi:10.1039/d6cp00731g)
Supplement: d6cp00731g1.pdf [file d6cp00731g1.pdf]

# Supporting information for “When motion slows: intrinsic photophysics of thioflavin T and X cations at cryogenic temperatures”

Iden Djavani-Tabrizi,<sup>a</sup> Thomas Toft Lindkvist,<sup>a</sup> Daniel E. Otzen,<sup>b</sup> and Steen Brøndsted Nielsen<sup>a</sup>

<sup>a</sup> Department of Physics and Astronomy, Aarhus University, Denmark

<sup>b</sup> Department of Molecular Biology and Genetics, Aarhus University, Denmark

## Contents

|                                                                                                                                                                                                                                                                                                                                                                                                                                                                                                                                                                                                                                                                                                |    |
|------------------------------------------------------------------------------------------------------------------------------------------------------------------------------------------------------------------------------------------------------------------------------------------------------------------------------------------------------------------------------------------------------------------------------------------------------------------------------------------------------------------------------------------------------------------------------------------------------------------------------------------------------------------------------------------------|----|
| Computational Data .....                                                                                                                                                                                                                                                                                                                                                                                                                                                                                                                                                                                                                                                                       | 2  |
| <b>Table S1: Computational data for thioflavins in this study.</b> Calculations were performed at $\omega$ B97XD/def2svp. VEE is the vertical excitation energy, and $f$ is the oscillator strength. Angles $\varphi$ and $\delta$ refer to twisting and wagging angles, respectively, defined as $\varphi = (\chi_1 + \chi_2)/2$ and $\delta = (\chi_1 - \chi_2)/2$ , where $\chi_1$ is dihedral N11-C7-C21-C23 for ThT <sup>+</sup> and N11-C7-C17-C19 for ThX <sup>+</sup> , respectively, and $\chi_2$ is dihedral S12-C7-C21-C22 for ThT <sup>+</sup> and S12-C7-C17-C18 for ThX <sup>+</sup> , respectively (numbering consistent with atom coordinates given in Tables S2-5 below)..... | 2  |
| <b>Figure S1: Computed structures of ThT<sup>+</sup> in S<sub>0</sub> (a) and S<sub>1</sub> (b)</b> .....                                                                                                                                                                                                                                                                                                                                                                                                                                                                                                                                                                                      | 3  |
| <b>Figure S2: Computed structures of ThX<sup>+</sup> in S<sub>0</sub> (a) and S<sub>1</sub> (b)</b> .....                                                                                                                                                                                                                                                                                                                                                                                                                                                                                                                                                                                      | 3  |
| <b>Table S2: Coordinates of the ground-state (S<sub>0</sub>) geometry of ThT<sup>+</sup></b> .....                                                                                                                                                                                                                                                                                                                                                                                                                                                                                                                                                                                             | 4  |
| <b>Table S3: Coordinates of the excited-state (S<sub>1</sub>) geometry of ThT<sup>+</sup></b> .....                                                                                                                                                                                                                                                                                                                                                                                                                                                                                                                                                                                            | 5  |
| <b>Table S4: Coordinates of the ground-state (S<sub>0</sub>) geometry of ThX<sup>+</sup></b> .....                                                                                                                                                                                                                                                                                                                                                                                                                                                                                                                                                                                             | 6  |
| <b>Table S5: Coordinates of the excited-state (S<sub>1</sub>) geometry of ThX<sup>+</sup></b> .....                                                                                                                                                                                                                                                                                                                                                                                                                                                                                                                                                                                            | 7  |
| Experimental data .....                                                                                                                                                                                                                                                                                                                                                                                                                                                                                                                                                                                                                                                                        | 8  |
| <b>Table S6: Fluorescence excitation spectrum of thioflavin T (ThT<sup>+</sup>), collected with 450-nm longpass filters</b> .....                                                                                                                                                                                                                                                                                                                                                                                                                                                                                                                                                              | 8  |
| <b>Table S7: Fluorescence excitation spectrum of thioflavin X (ThX<sup>+</sup>), collected with 450-nm longpass filters</b> .....                                                                                                                                                                                                                                                                                                                                                                                                                                                                                                                                                              | 10 |
| <b>Table S8: Dispersed fluorescence of thioflavin T (ThT<sup>+</sup>), collected with 450-nm longpass filters</b> .....                                                                                                                                                                                                                                                                                                                                                                                                                                                                                                                                                                        | 14 |
| <b>Table S9: Dispersed fluorescence of thioflavin X (ThX<sup>+</sup>), collected with 450-nm longpass filters</b> .....                                                                                                                                                                                                                                                                                                                                                                                                                                                                                                                                                                        | 17 |
| <b>Table S10: Dispersed fluorescence of thioflavin X (ThX<sup>+</sup>), collected with no longpass filters</b> .....                                                                                                                                                                                                                                                                                                                                                                                                                                                                                                                                                                           | 19 |

# Computational Data

**Table S1: Computational data for thioflavins in this study.** Calculations were performed at  $\omega$ B97XD/def2svp. VEE is the vertical excitation energy, and  $f$  is the oscillator strength. Angles  $\varphi$  and  $\delta$  refer to twisting and wagging angles, respectively, defined as  $\varphi = (\chi_1 + \chi_2)/2$  and  $\delta = (\chi_1 - \chi_2)/2$ , where  $\chi_1$  is dihedral N11-C7-C21-C23 for ThT<sup>+</sup> and N11-C7-C17-C19 for ThX<sup>+</sup>, respectively, and  $\chi_2$  is dihedral S12-C7-C21-C22 for ThT<sup>+</sup> and S12-C7-C17-C18 for ThX<sup>+</sup>, respectively (numbering consistent with atom coordinates given in Tables S2-5 below)

| Ion              | $S_0 \rightarrow S_1$ (ground-state geometry) |        |           |          | $S_1 \rightarrow S_0$ ( $S_1$ geometry) |        |           |          |
|------------------|-----------------------------------------------|--------|-----------|----------|-----------------------------------------|--------|-----------|----------|
|                  | VEE (eV)                                      | $f$    | $\varphi$ | $\delta$ | VEE (eV)                                | $f$    | $\varphi$ | $\delta$ |
| ThT <sup>+</sup> | 3.4996                                        | 0.9391 | -38.6     | -1.7     | 2.1105                                  | 0.0038 | -87.2     | 21.3     |
| ThX <sup>+</sup> | 3.4411                                        | 1.0609 | 38.5      | 1.7      | 2.0823                                  | 0.0040 | 87.4      | -21.5    |

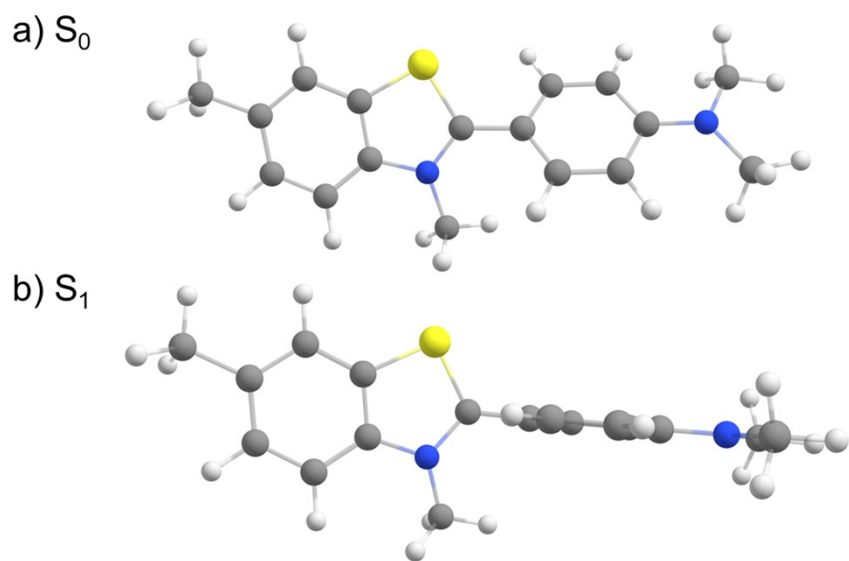

**Figure S1: Computed structures of ThT<sup>+</sup> in  $S_0$  (a) and  $S_1$  (b)**

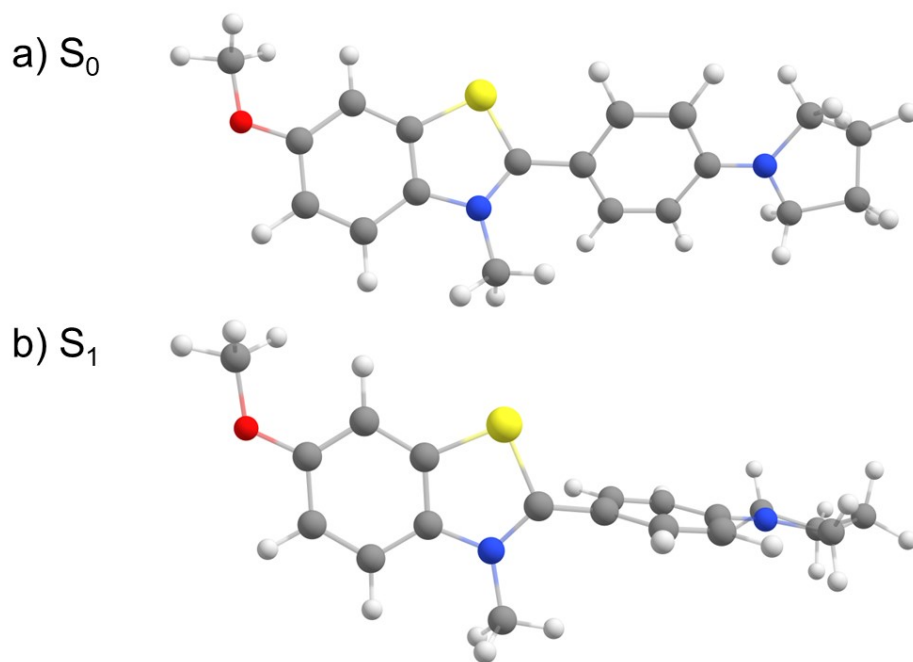

**Figure S2: Computed structures of ThX<sup>+</sup> in  $S_0$  (a) and  $S_1$  (b)**

**Table S2: Coordinates of the ground-state ( $S_0$ ) geometry of ThT<sup>+</sup>**

| Atom no. | Element | X        | Y        | Z        |
|----------|---------|----------|----------|----------|
| 1        | C       | -2.74742 | -0.66729 | -0.12388 |
| 2        | C       | -2.53479 | 0.689739 | 0.127946 |
| 3        | C       | -3.62163 | 1.560132 | 0.255718 |
| 4        | C       | -4.89554 | 1.029672 | 0.132747 |
| 5        | C       | -5.1266  | -0.34155 | -0.11373 |
| 6        | C       | -4.03371 | -1.19563 | -0.24348 |
| 7        | C       | -0.35217 | -0.0332  | 0.03366  |
| 8        | H       | -3.48377 | 2.626242 | 0.438014 |
| 9        | H       | -5.75378 | 1.698616 | 0.227634 |
| 10       | H       | -4.18147 | -2.25931 | -0.43971 |
| 11       | N       | -1.17228 | 1.003456 | 0.237422 |
| 12       | S       | -1.21829 | -1.49034 | -0.2806  |
| 13       | C       | -0.74556 | 2.329058 | 0.674921 |
| 14       | H       | -0.76704 | 3.040262 | -0.16215 |
| 15       | H       | -1.42704 | 2.671884 | 1.463098 |
| 16       | H       | 0.267363 | 2.268514 | 1.085923 |
| 17       | C       | -6.53497 | -0.85405 | -0.23745 |
| 18       | H       | -7.05924 | -0.35437 | -1.06582 |
| 19       | H       | -6.55979 | -1.93572 | -0.42172 |
| 20       | H       | -7.10493 | -0.65068 | 0.681435 |
| 21       | C       | 1.092388 | -0.01451 | 0.039264 |
| 22       | C       | 1.811148 | -1.11557 | 0.554594 |
| 23       | C       | 1.835787 | 1.038123 | -0.53853 |
| 24       | C       | 3.18722  | -1.15122 | 0.534124 |
| 25       | H       | 1.274266 | -1.95013 | 1.012709 |
| 26       | C       | 3.212206 | 1.007718 | -0.57939 |
| 27       | H       | 1.325849 | 1.878364 | -1.01309 |
| 28       | C       | 3.942928 | -0.08546 | -0.03224 |
| 29       | H       | 3.689062 | -2.01363 | 0.968348 |
| 30       | H       | 3.733278 | 1.833556 | -1.05981 |
| 31       | N       | 5.295374 | -0.11345 | -0.05615 |
| 32       | C       | 6.013935 | -1.2554  | 0.481544 |
| 33       | H       | 5.750531 | -2.18609 | -0.04659 |
| 34       | H       | 7.090247 | -1.09484 | 0.360379 |
| 35       | H       | 5.812683 | -1.39239 | 1.556442 |
| 36       | C       | 6.041264 | 0.990465 | -0.63373 |
| 37       | H       | 7.113769 | 0.79554  | -0.53037 |
| 38       | H       | 5.822617 | 1.113469 | -1.70721 |
| 39       | H       | 5.821422 | 1.939875 | -0.11945 |

**Table S3: Coordinates of the excited-state ( $S_1$ ) geometry of ThT<sup>+</sup>**

| Atom no. | Element | X        | Y        | Z        |
|----------|---------|----------|----------|----------|
| 1        | C       | -2.6875  | -0.61869 | 0.274451 |
| 2        | C       | -2.46186 | 0.717562 | -0.0785  |
| 3        | C       | -3.5287  | 1.49425  | -0.53865 |
| 4        | C       | -4.78152 | 0.902138 | -0.66062 |
| 5        | C       | -5.01359 | -0.44203 | -0.32644 |
| 6        | C       | -3.94384 | -1.20377 | 0.152497 |
| 7        | C       | -0.3577  | 0.166742 | 0.758384 |
| 8        | H       | -3.39247 | 2.544876 | -0.79699 |
| 9        | H       | -5.61456 | 1.508505 | -1.02382 |
| 10       | H       | -4.0956  | -2.24728 | 0.436505 |
| 11       | N       | -1.14075 | 1.115432 | 0.088504 |
| 12       | S       | -1.21691 | -1.36721 | 0.888675 |
| 13       | C       | -0.74713 | 2.503065 | -0.00254 |
| 14       | H       | -1.11387 | 2.936502 | -0.94288 |
| 15       | H       | -1.14039 | 3.09492  | 0.841099 |
| 16       | H       | 0.346959 | 2.580647 | -0.00132 |
| 17       | C       | -6.38839 | -1.03817 | -0.47777 |
| 18       | H       | -6.70538 | -1.03409 | -1.53179 |
| 19       | H       | -6.42066 | -2.07618 | -0.12084 |
| 20       | H       | -7.13336 | -0.46179 | 0.090846 |
| 21       | C       | 1.084229 | 0.085403 | 0.448944 |
| 22       | C       | 2.061312 | 0.392745 | 1.434861 |
| 23       | C       | 1.5399   | -0.32995 | -0.83752 |
| 24       | C       | 3.39945  | 0.294952 | 1.171939 |
| 25       | H       | 1.71847  | 0.705534 | 2.422085 |
| 26       | C       | 2.869351 | -0.42608 | -1.13164 |
| 27       | H       | 0.796059 | -0.57195 | -1.59837 |
| 28       | C       | 3.858126 | -0.12287 | -0.12795 |
| 29       | H       | 4.114096 | 0.531913 | 1.957537 |
| 30       | H       | 3.175295 | -0.73631 | -2.12898 |
| 31       | N       | 5.162811 | -0.22804 | -0.39486 |
| 32       | C       | 6.167776 | 0.08674  | 0.619931 |
| 33       | H       | 6.076025 | -0.59001 | 1.481392 |
| 34       | H       | 7.16437  | -0.03681 | 0.187827 |
| 35       | H       | 6.064653 | 1.126435 | 0.960228 |
| 36       | C       | 5.629696 | -0.67123 | -1.70797 |
| 37       | H       | 6.722422 | -0.70544 | -1.70712 |
| 38       | H       | 5.251594 | -1.67758 | -1.93576 |
| 39       | H       | 5.304868 | 0.026861 | -2.49244 |

**Table S4: Coordinates of the ground-state ( $S_0$ ) geometry of ThX<sup>+</sup>**

| Atom no. | Element | X        | Y        | Z        |
|----------|---------|----------|----------|----------|
| 1        | C       | 3.095736 | -0.45413 | -0.06025 |
| 2        | C       | 2.835013 | 0.903057 | 0.12803  |
| 3        | C       | 3.896845 | 1.814457 | 0.219774 |
| 4        | C       | 5.184577 | 1.330146 | 0.12818  |
| 5        | C       | 5.450137 | -0.04956 | -0.05429 |
| 6        | C       | 4.394485 | -0.95975 | -0.15231 |
| 7        | C       | 0.676547 | 0.108717 | 0.059795 |
| 8        | H       | 3.724935 | 2.88304  | 0.351927 |
| 9        | H       | 6.039748 | 2.004032 | 0.191508 |
| 10       | H       | 4.563563 | -2.02539 | -0.30036 |
| 11       | N       | 1.462813 | 1.177241 | 0.218459 |
| 12       | S       | 1.594939 | -1.33289 | -0.18487 |
| 13       | C       | 0.992434 | 2.507067 | 0.592888 |
| 14       | H       | 1.658556 | 2.907315 | 1.367051 |
| 15       | H       | 0.995462 | 3.179571 | -0.27587 |
| 16       | H       | -0.02028 | 2.433132 | 1.002321 |
| 17       | C       | -0.7672  | 0.078    | 0.059965 |
| 18       | C       | -1.44987 | -1.02422 | 0.622709 |
| 19       | C       | -1.5435  | 1.079712 | -0.5657  |
| 20       | C       | -2.82331 | -1.10799 | 0.600925 |
| 21       | H       | -0.88552 | -1.81598 | 1.122099 |
| 22       | C       | -2.91747 | 1.001334 | -0.60809 |
| 23       | H       | -1.05874 | 1.912674 | -1.07815 |
| 24       | C       | -3.60925 | -0.09312 | -0.01522 |
| 25       | H       | -3.30621 | -1.95856 | 1.079857 |
| 26       | H       | -3.47224 | 1.778623 | -1.13186 |
| 27       | C       | -5.71536 | -1.31507 | 0.449073 |
| 28       | C       | -5.818   | 0.884698 | -0.57141 |
| 29       | C       | -7.1294  | -1.05582 | -0.0683  |
| 30       | H       | -5.68477 | -1.35458 | 1.55297  |
| 31       | H       | -5.2965  | -2.25848 | 0.066497 |
| 32       | C       | -7.21363 | 0.469927 | -0.10852 |
| 33       | H       | -5.74899 | 0.925263 | -1.67361 |
| 34       | H       | -5.52186 | 1.869667 | -0.1788  |
| 35       | H       | -7.23893 | -1.47047 | -1.08241 |
| 36       | H       | -7.89691 | -1.51839 | 0.565513 |
| 37       | H       | -8.00251 | 0.845811 | -0.77272 |
| 38       | H       | -7.40742 | 0.867921 | 0.899674 |
| 39       | N       | -4.95219 | -0.16842 | -0.04266 |
| 40       | O       | 6.738225 | -0.3803  | -0.1259  |
| 41       | C       | 7.108212 | -1.72879 | -0.30802 |
| 42       | H       | 6.755741 | -2.35653 | 0.527075 |
| 43       | H       | 6.718808 | -2.12528 | -1.2603  |

44 H 8.202919 -1.74849 -0.33328

**Table S5: Coordinates of the excited-state ( $S_1$ ) geometry of ThX<sup>+</sup>**

| Atom no. | Element | X        | Y        | Z        |
|----------|---------|----------|----------|----------|
| 1        | C       | 3.036562 | -0.38956 | 0.266917 |
| 2        | C       | 2.766799 | 0.92477  | -0.12271 |
| 3        | C       | 3.807835 | 1.713736 | -0.62462 |
| 4        | C       | 5.071433 | 1.162089 | -0.7504  |
| 5        | C       | 5.33253  | -0.16599 | -0.37262 |
| 6        | C       | 4.303837 | -0.95509 | 0.148931 |
| 7        | C       | 0.69221  | 0.348069 | 0.772992 |
| 8        | H       | 3.63962  | 2.75063  | -0.9155  |
| 9        | H       | 5.902095 | 1.75026  | -1.14151 |
| 10       | H       | 4.476416 | -1.98183 | 0.4664   |
| 11       | N       | 1.437205 | 1.294501 | 0.056593 |
| 12       | S       | 1.598471 | -1.15793 | 0.923495 |
| 13       | C       | 1.020735 | 2.674154 | -0.04734 |
| 14       | H       | 1.413211 | 3.284879 | 0.784149 |
| 15       | H       | 1.371873 | 3.103563 | -0.99522 |
| 16       | H       | -0.07361 | 2.736919 | -0.03575 |
| 17       | C       | -0.7596  | 0.223405 | 0.5137   |
| 18       | C       | -1.70846 | 0.556322 | 1.514584 |
| 19       | C       | -1.24883 | -0.26452 | -0.73061 |
| 20       | C       | -3.05283 | 0.413779 | 1.306221 |
| 21       | H       | -1.3393  | 0.929786 | 2.470378 |
| 22       | C       | -2.58533 | -0.40458 | -0.9738  |
| 23       | H       | -0.52658 | -0.53529 | -1.50203 |
| 24       | C       | -3.54231 | -0.0751  | 0.047129 |
| 25       | H       | -3.75317 | 0.682764 | 2.094707 |
| 26       | H       | -2.92519 | -0.78384 | -1.93591 |
| 27       | C       | -5.89289 | 0.017831 | 0.844131 |
| 28       | C       | -5.44201 | -0.64643 | -1.4475  |
| 29       | C       | -7.15312 | -0.57347 | 0.220965 |
| 30       | H       | -5.9879  | 1.10389  | 1.009415 |
| 31       | H       | -5.6154  | -0.45133 | 1.796854 |
| 32       | C       | -6.93137 | -0.36672 | -1.27531 |
| 33       | H       | -5.24079 | -1.72064 | -1.59364 |
| 34       | H       | -4.98729 | -0.09588 | -2.28113 |
| 35       | H       | -7.22259 | -1.64615 | 0.456848 |
| 36       | H       | -8.06241 | -0.09003 | 0.599203 |
| 37       | H       | -7.54641 | -1.02323 | -1.90324 |
| 38       | H       | -7.15527 | 0.672658 | -1.55944 |
| 39       | N       | -4.84806 | -0.22054 | -0.16772 |
| 40       | O       | 6.598526 | -0.58854 | -0.54047 |
| 41       | C       | 6.946298 | -1.89826 | -0.16821 |
| 42       | H       | 6.784602 | -2.07159 | 0.909356 |

|      |          |          |          |
|------|----------|----------|----------|
| 43 H | 6.377931 | -2.64932 | -0.74299 |
| 44 H | 8.013466 | -2.01535 | -0.38998 |

## Experimental data

**Table S6: Fluorescence excitation spectrum of thioflavin T (ThT<sup>+</sup>), collected with 450-nm longpass filters**

| <u>Wavelength (nm)</u> | <u>Normalized intensity</u> |
|------------------------|-----------------------------|
| 420.4131               | 0.85294                     |
| 420.6102               | 0.817069                    |
| 420.8074               | 1.000998                    |
| 421.0045               | 0.921184                    |
| 421.2017               | 1.002368                    |
| 421.3989               | 0.892428                    |
| 421.5962               | 0.897606                    |
| 421.7935               | 0.978726                    |
| 421.9908               | 0.838552                    |
| 422.1882               | 0.78972                     |
| 422.3856               | 1.029072                    |
| 422.583                | 0.887289                    |
| 422.7805               | 1.055641                    |
| 422.978                | 1.045287                    |
| 423.1755               | 1.066869                    |
| 423.3731               | 0.976939                    |
| 423.5707               | 0.993097                    |
| 423.7683               | 0.962978                    |
| 423.966                | 1.017286                    |
| 424.1637               | 0.835052                    |
| 424.3614               | 0.941958                    |
| 424.5592               | 0.978418                    |
| 424.7569               | 1.022872                    |
| 424.9548               | 0.934895                    |
| 425.1526               | 0.9675                      |
| 425.3505               | 0.910095                    |
| 425.5484               | 1.051166                    |
| 425.7463               | 0.794622                    |
| 425.9443               | 0.869481                    |
| 426.1423               | 0.824081                    |
| 426.3403               | 0.758871                    |
| 426.5384               | 0.714511                    |
| 426.7365               | 0.728395                    |
| 426.9346               | 0.752765                    |
| 427.1327               | 0.643364                    |
| 427.3309               | 0.697077                    |
| 427.5291               | 0.630477                    |
| 427.7273               | 0.600674                    |
| 427.9256               | 0.693757                    |

|          |          |
|----------|----------|
| 428.1238 | 0.497178 |
| 428.3222 | 0.386104 |
| 428.5205 | 0.459305 |
| 428.7189 | 0.548393 |
| 428.9172 | 0.400173 |
| 429.1157 | 0.300178 |
| 429.3141 | 0.373537 |
| 429.5126 | 0.337152 |
| 429.7111 | 0.24029  |
| 429.9096 | 0.232823 |
| 430.1081 | 0.26667  |
| 430.3067 | 0.234314 |
| 430.5053 | 0.19187  |
| 430.7039 | 0.181134 |
| 430.9025 | 0.197877 |
| 431.1012 | 0.140935 |
| 431.2999 | 0.135263 |
| 431.4986 | 0.144836 |
| 431.6973 | 0.121671 |
| 431.8961 | 0.118691 |
| 432.0949 | 0.143156 |
| 432.2937 | 0.093075 |
| 432.4925 | 0.107117 |
| 432.6913 | 0.063657 |
| 432.8902 | 0.057604 |
| 433.0891 | 0.071561 |
| 433.288  | 0.066302 |
| 433.4869 | 0.052343 |
| 433.6859 | 0.080889 |
| 433.8848 | 0.067178 |
| 434.0838 | 0.050202 |
| 434.2828 | 0.027262 |
| 434.4818 | 0.02626  |
| 434.6809 | 0.038367 |
| 434.8799 | 0.038854 |
| 435.079  | 0.047225 |
| 435.2781 | 0.034616 |
| 435.4772 | 0.03214  |
| 435.6763 | 0.044845 |
| 435.8755 | 0.031659 |
| 436.0746 | 0.026722 |
| 436.2738 | 0.031635 |
| 436.473  | 0.018529 |
| 436.6722 | 0.03125  |
| 436.8714 | 0.011988 |
| 437.0707 | 0.016655 |

|          |          |
|----------|----------|
| 437.27   | 0.025025 |
| 437.4692 | 0.026019 |
| 437.6685 | 0.029578 |
| 437.8679 | -0.00176 |
| 438.0672 | 0.008292 |
| 438.2665 | 0.010012 |
| 438.4659 | 0.011974 |
| 438.6653 | 0.020567 |
| 438.8647 | 0.015605 |
| 439.0641 | 0.008521 |
| 439.2636 | 0.001345 |
| 439.4631 | 0.014222 |
| 439.6625 | 0.019271 |
| 439.862  | 0.040642 |
| 440.0616 | 0.018123 |
| 440.2611 | -0.00822 |

**Table S7: Fluorescence excitation spectrum of thioflavin X (ThX<sup>+</sup>), collected with 450-nm longpass filters**

| Wavelength (nm) | Normalized intensity |
|-----------------|----------------------|
| 420             | 0.662461             |
| 420.5           | 0.572034             |
| 421             | 0.403882             |
| 421.5           | 0.559967             |
| 422             | 0.459344             |
| 422.2           | 0.315109             |
| 422.4           | 0.543098             |
| 422.5           | 0.633312             |
| 422.6           | 0.708396             |
| 422.8           | 0.812624             |
| 423             | 0.687684             |
| 423.2           | 0.746394             |
| 423.4           | 0.660386             |
| 423.5           | 0.587194             |
| 423.6           | 0.602976             |
| 423.8           | 0.688062             |
| 424             | 0.667406             |
| 424.2           | 0.553238             |
| 424.4           | 0.633665             |
| 424.5           | 0.622979             |
| 424.6           | 0.658977             |
| 424.8           | 0.656865             |
| 425             | 0.703591             |
| 425.2           | 0.59975              |
| 425.4           | 0.663848             |

|       |          |
|-------|----------|
| 425.5 | 0.872027 |
| 425.6 | 1.058063 |
| 425.8 | 0.673359 |
| 426   | 0.789839 |
| 426.2 | 0.713303 |
| 426.4 | 0.774463 |
| 426.5 | 0.799712 |
| 426.6 | 0.628515 |
| 426.8 | 0.757514 |
| 427   | 0.746821 |
| 427.2 | 0.660537 |
| 427.4 | 0.726088 |
| 427.5 | 0.720605 |
| 427.6 | 0.716296 |
| 427.8 | 0.763193 |
| 428   | 0.830511 |
| 428.2 | 0.715877 |
| 428.4 | 0.66446  |
| 428.5 | 0.80577  |
| 428.6 | 0.683207 |
| 428.8 | 0.838864 |
| 429   | 0.811729 |
| 429.1 | 0.767332 |
| 429.2 | 0.745272 |
| 429.3 | 0.699429 |
| 429.4 | 0.694066 |
| 429.5 | 0.797509 |
| 429.6 | 0.838251 |
| 429.7 | 0.813925 |
| 429.8 | 0.704316 |
| 429.9 | 0.873184 |
| 430   | 0.928611 |
| 430.1 | 0.844813 |
| 430.2 | 0.833849 |
| 430.3 | 0.904799 |
| 430.4 | 0.893884 |
| 430.5 | 0.854054 |
| 430.6 | 0.796821 |
| 430.7 | 0.775152 |
| 430.8 | 0.83708  |
| 430.9 | 0.732877 |
| 431   | 0.882724 |
| 431.1 | 0.902197 |
| 431.2 | 0.781387 |
| 431.3 | 0.885695 |
| 431.4 | 0.807474 |

|       |          |
|-------|----------|
| 431.5 | 0.805199 |
| 431.6 | 0.776608 |
| 431.7 | 0.839174 |
| 431.8 | 0.806129 |
| 431.9 | 0.736333 |
| 432   | 0.775208 |
| 432.1 | 0.68967  |
| 432.2 | 0.795427 |
| 432.3 | 0.816996 |
| 432.4 | 0.815236 |
| 432.5 | 0.823272 |
| 432.6 | 0.881919 |
| 432.7 | 0.863918 |
| 432.8 | 0.801921 |
| 432.9 | 0.904801 |
| 433   | 0.833785 |
| 433.1 | 0.936837 |
| 433.2 | 1.149756 |
| 433.3 | 0.99256  |
| 433.4 | 0.95714  |
| 433.5 | 1.012361 |
| 433.6 | 0.993369 |
| 433.7 | 0.987406 |
| 433.8 | 0.937922 |
| 433.9 | 0.915162 |
| 434   | 0.964939 |
| 434.1 | 0.964445 |
| 434.2 | 0.963275 |
| 434.3 | 0.887925 |
| 434.4 | 0.894174 |
| 434.5 | 0.901113 |
| 434.6 | 0.781769 |
| 434.7 | 0.857979 |
| 434.8 | 0.850269 |
| 434.9 | 0.678131 |
| 435   | 0.695974 |
| 435.1 | 0.622741 |
| 435.2 | 0.61517  |
| 435.3 | 0.645156 |
| 435.4 | 0.664284 |
| 435.5 | 0.637607 |
| 435.6 | 0.635153 |
| 435.7 | 0.555756 |
| 435.8 | 0.594283 |
| 435.9 | 0.664301 |
| 436   | 0.592022 |

|       |          |
|-------|----------|
| 436.1 | 0.574775 |
| 436.2 | 0.624107 |
| 436.3 | 0.59337  |
| 436.4 | 0.610454 |
| 436.5 | 0.555976 |
| 436.6 | 0.569888 |
| 436.7 | 0.603141 |
| 436.8 | 0.62559  |
| 436.9 | 0.604219 |
| 437   | 0.52975  |
| 437.1 | 0.583503 |
| 437.2 | 0.62278  |
| 437.3 | 0.48179  |
| 437.4 | 0.587015 |
| 437.5 | 0.588255 |
| 437.6 | 0.58814  |
| 437.7 | 0.527574 |
| 437.8 | 0.626805 |
| 437.9 | 0.500106 |
| 438   | 0.507103 |
| 438.1 | 0.48768  |
| 438.2 | 0.419464 |
| 438.3 | 0.426429 |
| 438.4 | 0.524802 |
| 438.5 | 0.393365 |
| 438.6 | 0.545506 |
| 438.7 | 0.402074 |
| 438.8 | 0.455181 |
| 438.9 | 0.355323 |
| 439   | 0.401733 |
| 439.1 | 0.45907  |
| 439.2 | 0.420831 |
| 439.3 | 0.361773 |
| 439.4 | 0.406611 |
| 439.5 | 0.302166 |
| 439.6 | 0.421834 |
| 439.7 | 0.309851 |
| 439.8 | 0.375409 |
| 439.9 | 0.261238 |
| 440   | 0.286967 |
| 440.1 | 0.27945  |
| 440.2 | 0.32345  |
| 440.3 | 0.342521 |
| 440.4 | 0.283235 |
| 440.5 | 0.265167 |
| 440.6 | 0.288417 |

|       |          |
|-------|----------|
| 440.7 | 0.294235 |
| 440.8 | 0.247978 |
| 440.9 | 0.165994 |
| 441   | 0.26438  |
| 441.2 | 0.421327 |
| 441.4 | 0.280659 |
| 441.5 | 0.13554  |
| 441.6 | 0.201288 |
| 441.8 | 0.284815 |
| 442   | 0.15372  |
| 442.5 | 0.116552 |
| 443   | 0.077126 |
| 443.5 | 0.11987  |
| 444   | 0.081895 |
| 444.5 | 0.131399 |
| 445   | 0.070396 |
| 445.5 | 0.061897 |
| 446   | 0.063168 |
| 446.5 | 0.07023  |
| 447   | 0.060996 |
| 447.5 | 0.05998  |
| 448   | 0.019206 |

**Table S8: Dispersed fluorescence of thioflavin T (ThT<sup>+</sup>), collected with 450-nm longpass filters**

| <u>Wavelength (nm)</u> | <u>Normalized intensity</u> |
|------------------------|-----------------------------|
| 457                    | 0.438515882                 |
| 458.5                  | 0.617912745                 |
| 460                    | 0.498637693                 |
| 461.5                  | 0.411360688                 |
| 463                    | 0.617137889                 |
| 464.5                  | 0.635769663                 |
| 466                    | 0.568797417                 |
| 467.5                  | 0.671307394                 |
| 469                    | 0.699343107                 |
| 470.5                  | 0.67299799                  |
| 472                    | 0.678157829                 |
| 473.5                  | 0.705436296                 |
| 475                    | 0.779523132                 |
| 476.5                  | 0.801448046                 |
| 478                    | 0.954675896                 |
| 479.5                  | 1.048856167                 |
| 481                    | 1.073686792                 |
| 482.5                  | 0.953249456                 |
| 484                    | 0.829395707                 |
| 485.5                  | 1.020573909                 |

|       |             |
|-------|-------------|
| 487   | 0.790635277 |
| 488.5 | 0.90378192  |
| 490   | 1.052254969 |
| 491.5 | 0.93359628  |
| 493   | 1.01823173  |
| 494.5 | 0.841564474 |
| 496   | 0.841670137 |
| 497.5 | 1.027283461 |
| 499   | 0.973941643 |
| 500.5 | 0.96006467  |
| 502   | 0.987695344 |
| 503.5 | 0.927960961 |
| 505   | 0.837549309 |
| 506.5 | 1.012772514 |
| 508   | 1.111126444 |
| 509.5 | 0.891172893 |
| 511   | 0.945483282 |
| 512.5 | 1.071432665 |
| 514   | 1.133016137 |
| 515.5 | 0.853715631 |
| 517   | 0.794844156 |
| 518.5 | 0.937206407 |
| 520   | 1.119737916 |
| 521.5 | 0.959747683 |
| 523   | 0.993718091 |
| 524.5 | 1.084534782 |
| 526   | 1.169328725 |
| 527.5 | 0.980228546 |
| 529   | 0.937699497 |
| 530.5 | 0.988170824 |
| 532   | 0.958426905 |
| 533.5 | 0.927943351 |
| 535   | 0.814374059 |
| 536.5 | 0.83994432  |
| 538   | 0.843131797 |
| 539.5 | 0.962706226 |
| 541   | 0.909100252 |
| 542.5 | 0.780386041 |
| 544   | 0.769432389 |
| 545.5 | 0.839803437 |
| 547   | 0.788610085 |
| 548.5 | 0.782323182 |
| 550   | 0.736342499 |
| 551.5 | 0.882579032 |
| 553   | 0.788786188 |
| 554.5 | 0.753089964 |

|       |             |
|-------|-------------|
| 556   | 0.690714025 |
| 557.5 | 0.838782035 |
| 559   | 0.640225087 |
| 560.5 | 0.712762211 |
| 562   | 0.828937837 |
| 563.5 | 0.640471632 |
| 565   | 0.743862128 |
| 566.5 | 0.651442894 |
| 568   | 0.56516968  |
| 569.5 | 0.563021215 |
| 571   | 0.634765872 |
| 572.5 | 0.599967776 |
| 574   | 0.602010579 |
| 575.5 | 0.514821626 |
| 577   | 0.632546965 |
| 578.5 | 0.655422838 |
| 580   | 0.674442041 |
| 581.5 | 0.542188144 |
| 583   | 0.50650953  |
| 584.5 | 0.504995038 |
| 586   | 0.472327797 |
| 587.5 | 0.423071586 |
| 589   | 0.482224826 |
| 590.5 | 0.478579479 |
| 592   | 0.51078885  |
| 593.5 | 0.562616176 |
| 595   | 0.612330257 |
| 596.5 | 0.397571766 |
| 598   | 0.266233609 |
| 599.5 | 0.362069256 |
| 601   | 0.480093971 |
| 602.5 | 0.447268237 |
| 604   | 0.423177248 |
| 605.5 | 0.385156454 |
| 607   | 0.418299175 |
| 608.5 | 0.312091019 |
| 610   | 0.395687457 |
| 611.5 | 0.24969747  |
| 613   | 0.251440897 |
| 614.5 | 0.302528587 |
| 616   | 0.207097979 |
| 617.5 | 0.345462675 |
| 619   | 0.249204379 |
| 620.5 | 0.273612355 |
| 622   | 0.270301605 |

**Table S9: Dispersed fluorescence of thioflavin X (ThX<sup>+</sup>), collected with 450-nm longpass filters**

| Wavelength (nm) | Normalized intensity |
|-----------------|----------------------|
| 430             | -0.11581             |
| 431.5           | -0.14863             |
| 433             | 0.11974              |
| 434.5           | -0.02843             |
| 436             | -0.05803             |
| 437.5           | 0.079463             |
| 439             | 0.05498              |
| 440.5           | -0.0077              |
| 442             | -0.00555             |
| 443.5           | 0.082633             |
| 445             | -0.0596              |
| 446.5           | -0.03616             |
| 448             | 0.01771              |
| 449.5           | 0.043963             |
| 451             | 0.051367             |
| 452.5           | 0.21107              |
| 454             | 0.227794             |
| 455.5           | 0.340405             |
| 457             | 0.275934             |
| 458.5           | 0.323746             |
| 460             | 0.336324             |
| 461.5           | 0.444622             |
| 463             | 0.460242             |
| 464.5           | 0.486546             |
| 466             | 0.556961             |
| 467.5           | 0.598558             |
| 469             | 0.620325             |
| 470.5           | 0.609898             |
| 472             | 0.647344             |
| 473.5           | 0.688534             |
| 475             | 0.812061             |
| 476.5           | 0.686843             |
| 478             | 0.758022             |
| 479.5           | 0.743237             |
| 481             | 0.830082             |
| 482.5           | 0.840273             |
| 484             | 0.883777             |
| 485.5           | 0.876774             |
| 487             | 0.905421             |
| 488.5           | 0.964524             |
| 490             | 0.9344               |

|       |          |
|-------|----------|
| 491.5 | 0.907568 |
| 493   | 1.005099 |
| 494.5 | 0.925391 |
| 496   | 0.99031  |
| 497.5 | 0.964941 |
| 499   | 0.95367  |
| 500.5 | 1.006367 |
| 502   | 0.973224 |
| 503.5 | 1.008588 |
| 505   | 1.044456 |
| 506.5 | 0.962597 |
| 508   | 0.901193 |
| 509.5 | 1.029432 |
| 511   | 1.022914 |
| 512.5 | 1.010736 |
| 514   | 0.97396  |
| 515.5 | 0.904867 |
| 517   | 1.052832 |
| 518.5 | 0.987922 |
| 520   | 0.975751 |
| 521.5 | 1.014554 |
| 523   | 0.981453 |
| 524.5 | 1.00238  |
| 526   | 0.933464 |
| 527.5 | 0.937298 |
| 529   | 0.973711 |
| 530.5 | 0.897403 |
| 532   | 0.843109 |
| 533.5 | 0.85183  |
| 535   | 0.806317 |
| 536.5 | 0.755611 |
| 538   | 0.791253 |
| 539.5 | 0.714864 |
| 541   | 0.774187 |
| 542.5 | 0.959222 |
| 544   | 0.659168 |
| 545.5 | 0.704042 |
| 547   | 0.704062 |
| 548.5 | 0.718287 |
| 550   | 0.701709 |
| 551.5 | 0.669939 |
| 553   | 0.59388  |
| 554.5 | 0.649404 |
| 556   | 0.514786 |
| 557.5 | 0.487872 |
| 559   | 0.58878  |

|       |          |
|-------|----------|
| 560.5 | 0.575667 |
| 562   | 0.498233 |
| 563.5 | 0.49086  |
| 565   | 0.526662 |
| 566.5 | 0.595598 |
| 568   | 0.352799 |
| 569.5 | 0.429999 |
| 571   | 0.476143 |
| 572.5 | 0.500615 |
| 574   | 0.463733 |
| 575.5 | 0.415967 |
| 577   | 0.441602 |
| 578.5 | 0.358964 |
| 580   | 0.445236 |
| 581.5 | 0.331964 |
| 583   | 0.303057 |
| 584.5 | 0.365997 |
| 586   | 0.404647 |
| 587.5 | 0.391245 |
| 589   | 0.31827  |
| 590.5 | 0.258668 |
| 592   | 0.286518 |
| 593.5 | 0.237336 |
| 595   | 0.3417   |

**Table S10: Dispersed fluorescence of thioflavin X (ThX<sup>+</sup>), collected with no longpass filters**

| Wavelength (nm) | Normalized intensity |
|-----------------|----------------------|
| 437.5           | 0.093137             |
| 439             | 0.310875             |
| 440.5           | 0.10953              |
| 442             | 0.161252             |
| 443.5           | 0.265538             |
| 445             | 0.222783             |
| 446.5           | 0.356293             |
| 448             | 0.017514             |
| 449.5           | 0.059829             |
| 451             | 0.1944               |
| 452.5           | 0.215837             |
| 454             | 0.076863             |
| 455.5           | 0.51102              |
| 457             | 0.34096              |
| 458.5           | 0.336557             |
| 460             | 0.288097             |
| 461.5           | 0.485059             |
| 463             | 0.524711             |

|       |          |
|-------|----------|
| 464.5 | 0.360917 |
| 466   | 0.623312 |
| 467.5 | 0.583279 |
| 469   | 0.583199 |
| 470.5 | 0.318001 |
| 472   | 0.346805 |
| 473.5 | 0.66933  |
| 475   | 0.557918 |
| 476.5 | 0.723154 |
| 478   | 0.969577 |
| 479.5 | 0.719111 |
| 481   | 0.749876 |
| 482.5 | 0.675175 |
| 484   | 1.212618 |
| 485.5 | 0.869472 |
| 487   | 1.016529 |
| 488.5 | 0.909877 |
| 490   | 0.98421  |
| 491.5 | 0.955338 |
| 493   | 1.092724 |
| 494.5 | 1.0928   |
| 496   | 0.995805 |
| 497.5 | 1.005985 |
| 499   | 1.048534 |
| 500.5 | 1.068477 |
| 502   | 0.835762 |
| 503.5 | 0.822925 |
| 505   | 1.022005 |
| 506.5 | 1.05624  |
| 508   | 1.03622  |
| 509.5 | 1.013975 |
| 511   | 0.887856 |
| 512.5 | 1.0524   |
| 514   | 1.322638 |
| 515.5 | 1.119146 |
| 517   | 1.106188 |
| 518.5 | 1.249376 |
| 520   | 1.100875 |
| 521.5 | 1.1149   |
| 523   | 1.021683 |
| 524.5 | 0.861113 |
| 526   | 0.842528 |
| 527.5 | 0.908536 |
| 529   | 0.569509 |
| 530.5 | 0.742618 |
| 532   | 1.017207 |

|       |          |
|-------|----------|
| 533.5 | 0.805024 |
| 535   | 0.466586 |
| 536.5 | 0.541317 |
| 538   | 0.6756   |
| 539.5 | 0.668164 |
| 541   | 0.819907 |
| 542.5 | 0.648031 |
| 544   | 0.500723 |
| 545.5 | 0.685973 |
| 547   | 0.681823 |
| 548.5 | 0.860915 |
| 550   | 0.829121 |
| 551.5 | 0.741917 |
| 553   | 0.817121 |
| 554.5 | 0.83024  |
| 556   | 0.940483 |
| 557.5 | 0.424376 |
| 559   | 0.846869 |
| 560.5 | 0.521646 |
| 562   | 0.531921 |
| 563.5 | 0.536543 |
| 565   | 0.413882 |
